# Supplementary material for: A MOF-Templated Double-Shelled Co3O4/NiCo2O4 Nanocomposite for Electrochemical Detection of Alfuzosin
Source: MDPI journal article supplement (doi:10.3390/nano14090757), 2024-04-25
Supplement: s1 [file s1]

## **Supplementary Materials**

**for**

### **A MOF-templated Double-Shelled Co<sub>3</sub>O<sub>4</sub>/NiCo<sub>2</sub>O<sub>4</sub> Nanocomposite for Electrochemical Detection of Alfuzosin**

Al-Amin<sup>1</sup>, Gajapaneni Venkata Prasad<sup>2</sup>, Seung Joo Jang<sup>1</sup>, Jeong-Wook Oh<sup>3</sup>, Tae Hyun Kim<sup>1,\*</sup>

<sup>1</sup>Department of Chemistry, Soonchunhyang University, Asan 31538, Republic of Korea

<sup>2</sup>Department of Chemistry, Presidency University, Yelahanka, Bengaluru-560064, India

<sup>3</sup>Department of Chemistry, Hankook University of Foreign Studies, Yongin 17035, Republic of Korea

**\*Corresponding Author:** Prof. Tae Hyun Kim (E-mail: [thkim@sch.ac.kr](mailto:thkim@sch.ac.kr)).

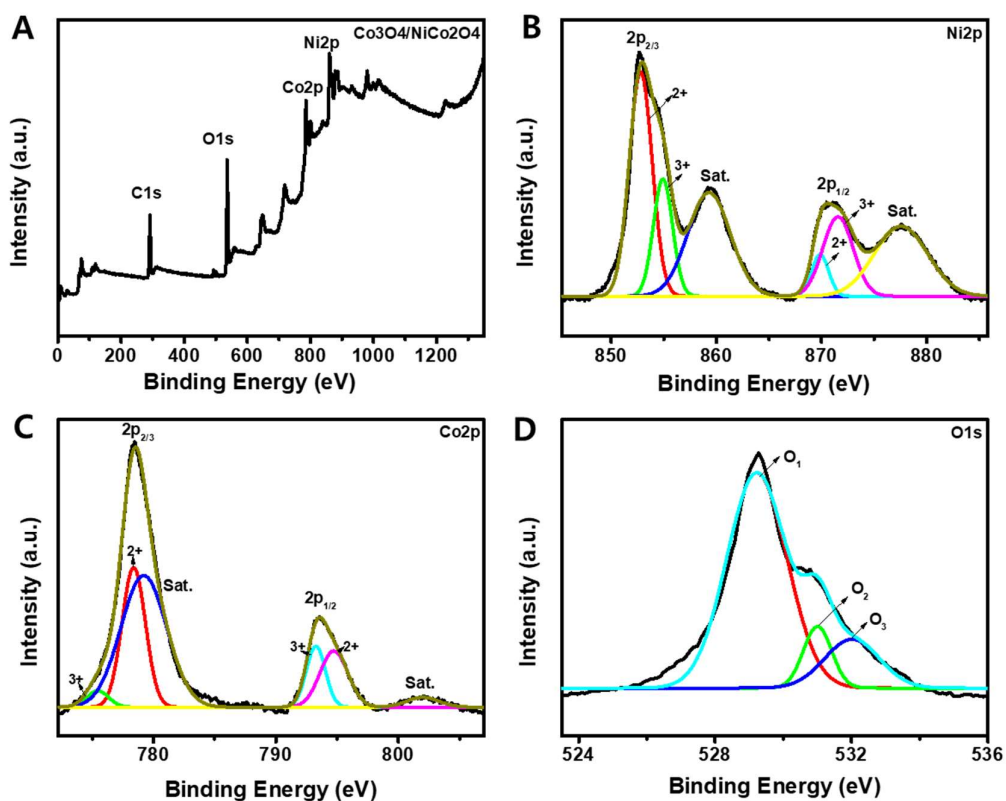

**Figure S1.** (A) XPS survey spectra of  $\text{Co}_3\text{O}_4/\text{NiCo}_2\text{O}_4$  DSNCs; XPS spectra of (B) Ni 2p, (C) Co 2p, and (D) O 1s.

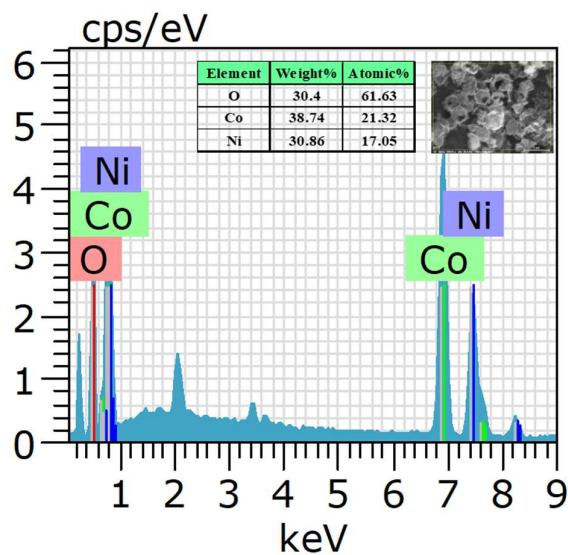

**Figure S2.** EDS spectrum of  $\text{Co}_3\text{O}_4/\text{NiCo}_2\text{O}_4$ .

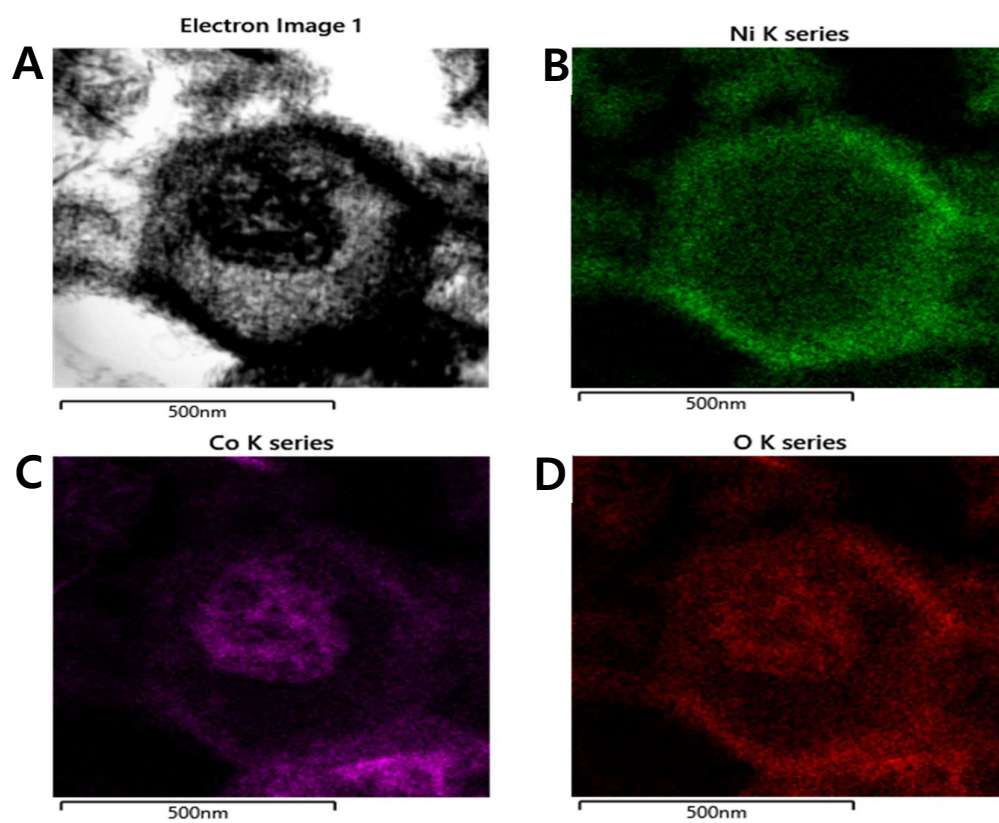

**Figure S3.** EDS mapping analysis of the  $\text{Co}_3\text{O}_4/\text{NiCo}_2\text{O}_4$  DSNCs nanocomposite.

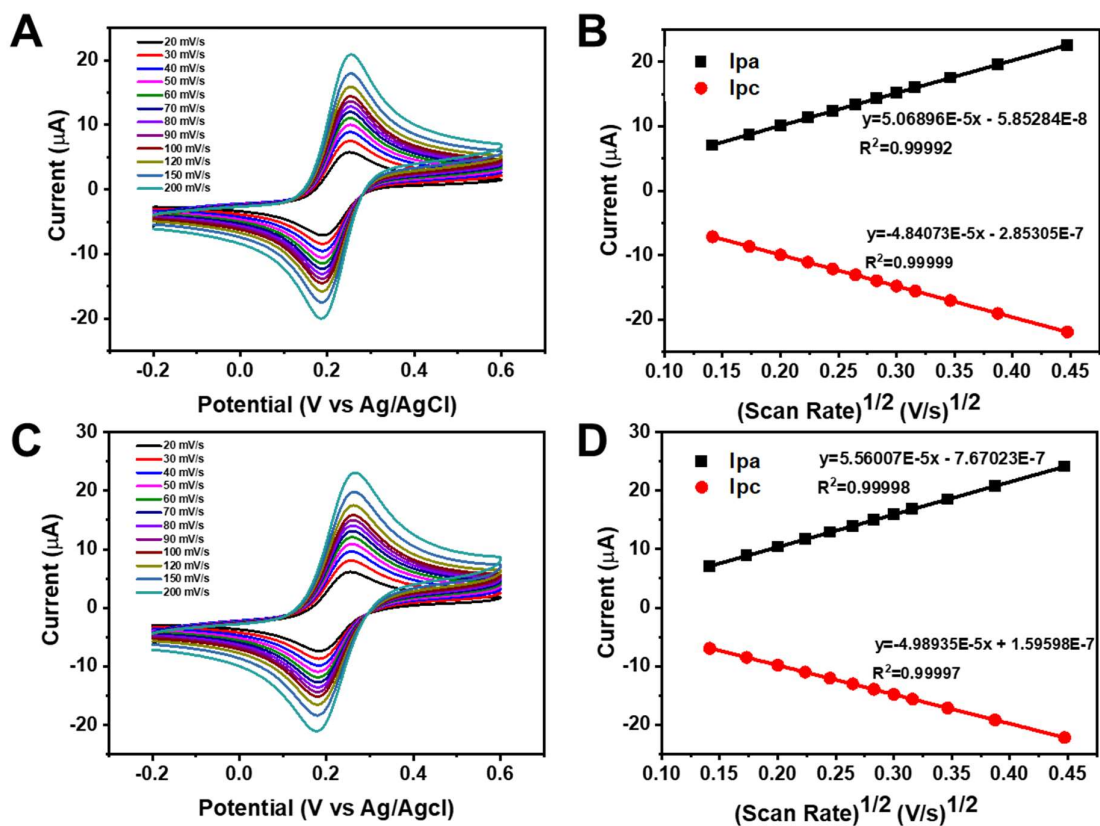

**Figure S4.** CV curves at various scan rates from 20 to 200 mV/s at (A) bare GCE and (C)  $\text{Co}_3\text{O}_4$ -GCE. Linear plots of  $v^{1/2}$  vs. redox peak currents ( $I_{pa}/I_{pc}$ ) at (B) bare GCE and (D)  $\text{Co}_3\text{O}_4$ -GCE in 1 mM  $[\text{Fe}(\text{CN})_6]^{3-}$  in 0.1M KCl solution.
